# Supplementary material for: Assessing the Statistical Uniqueness of the Younger Dryas: A Robust Multivariate Analysis
Source: Copernicus journal article supplement (doi:10.5194/cp-2020-43), 2020-04-07
Supplement: Supplementary file [file cp-2020-43-RC1-supplement.pdf]

## Technical Corrections

Lines 17-18

Please add a citation for the 8-16°C abrupt warming

Lines 23-24

Please add citations for the three proposed triggering mechanisms that were mentioned

Line 63

Add a space between 460,1200

Line 76

$\delta^{18}$  should be  $\delta^{18}\text{O}$

Line 103-104

Please include a citation for the statement about the relative robustness of median/MAD as compared to mean/variance.

Line 138

BA/YA should be BA/YD

Line 141

BA/YA should be BA/YD

Line 157

BA/YA should be BA/YD

Line 172

BA/YA should be BA/YD

Line 178

BA/YA should be BA/YD

Line 190

The CH<sub>4</sub> and  $\delta^{18}\text{O}$  records are on the same (NGRIP) ice core. Replace 'cores' with records.

Line 192

BA/YA should be BA/YD

Line 194

BA/YA should be BA/YD

Line 196

BA/YA should be BA/YD

Line 204

BA/YA should be BA/YD

Line 216

BA/YA should be BA/YD

Line 223

BA/YA should be BA/YD

Figure 3

Change 'Reigon' to Region

Figure 3 caption

Metrics should not be capitalized in first line.

Figure 6

$\delta^{18}\text{O}$  units should be per mil, not percent
